# Supplementary material for: Social mindfulness and prosociality vary across the globe
Source: PubMed Central journal article supplement — Proc Natl Acad Sci U S A. 2021 Aug 23;118(35):e2023846118. doi: 10.1073/pnas.2023846118 (PMC8536393; doi:10.1073/pnas.2023846118), 2021-08-23
Supplement: pnas.2023846118.sapp.pdf [file pnas.2023846118.sapp.pdf]

# PNAS

www.pnas.org

Supplementary Information for

## **Social Mindfulness and Prosociality Vary Across the Globe**

Niels J. Van Doesum,\* Ryan O. Murphy, Marcello Gallucci, Efrat Aharonov-Majar, Ursula Athenstaedt, Wing Tung Au, Liying Bai, Robert Böhm, Inna Bovina, Nancy R. Buchan, Xiao-Ping Chen, Kitty B. Dumont, Jan B. Engelmann, Kimmo Eriksson, Hyun Euh, Susann Fiedler, Justin Friesen, Simon Gächter, Camilo Garcia, Roberto González, Sylvie Graf, Katarzyna Growiec, Serge Guimond, Martina Hřebíčková, Elizabeth Immer-Bernold, Jeff Joireman, Gokhan Karagonlar, Kerry Kawakami, Toko Kiyonari, Yu Kou, D. Michael Kuhlman, Alexandros-Andreas Kyrtis, Siugmin Lay, Geoffrey J. Leonardelli, Norman P. Li, Yang Li, Boris Maciejovsky, Zoi Manesi, Ali Mashuri, Aurelia Mok, Karin S. Moser, Ladislav Moták, Adrian Neteđu, Chandrasekhar Pammi,† Michael J. Platow, Karolina Raczka-Winkler, Christopher P. Reinders Folmer, Cecilia Reyna, Angelo Romano, Shaul Shalvi, Cláudia Simão, Adam W. Stivers, Pontus Strimling, Yannis Tsirbas, Sonja Utz, Leander van der Meij, Sven Waldzus, Yiwen Wang, Bernd Weber, Ori Weisel, Tim Wildschut, Fabian Winter, Junhui Wu, Jose C. Yong, and Paul A. M. Van Lange.

Corresponding author: Niels J. Van Doesum  
Email: n.j.van.doesum@fsw.leidenuniv.nl

† Deceased February 11, 2018

### **This PDF file includes:**

- Protocol
- Tables S1 and S2
- SVO; Tables S3 and S4
- Robustness check (SoMi); Tables S5 and S6
- SI References

## Protocol

Below, we report the full questionnaire containing all measures. Note that not all variables were reported in the main text.

### 1 - SVO Triple Dominance (1)

In this task we ask you to imagine that you have been randomly paired with another person, whom we will refer to simply as the "Other." This other person is someone you do not know and that you will not knowingly meet in the future. Both you and the "Other" person will be making choices by choosing option A, B, or C. Your own choices will produce points for both yourself and the "Other" person. Likewise, the other's choice will produce points for him/her and for you. Every point has value: The more points you receive, the better for you, and the more points the "Other" receives, the better for him/her.

Here's an example of how this task works:

|                   |                   |                   |
|-------------------|-------------------|-------------------|
| You: <b>500</b>   | You: <b>500</b>   | You: <b>550</b>   |
| Other: <b>100</b> | Other: <b>500</b> | Other: <b>300</b> |
| <b>A</b>          | <b>B</b>          | <b>C</b>          |

In this example, if you chose A, you would receive 500 points and the other would receive 100 points; if you chose B, you would receive 500 points and the other 500; and if you chose C, you would receive 550 points and the other 300. So, you see that your choice influences both the number of points you receive and the number of points the other receives. Before you begin making choices, please keep in mind that there are no right or wrong answers; choose the option that you, for whatever reason, prefer most.

Also, remember that the points have value: The more of them you accumulate the better for you. Likewise, from the "other's" point of view, the more points he/she accumulates, the better for him/her.

*[All trials offered in random order]*

|                                   |                                   |                                   |
|-----------------------------------|-----------------------------------|-----------------------------------|
| (1)                               | (2)                               | (3)                               |
| You: <b>480</b> Other: <b>80</b>  | You: <b>560</b> Other: <b>300</b> | You: <b>520</b> Other: <b>520</b> |
| You: <b>540</b> Other: <b>280</b> | You: <b>500</b> Other: <b>500</b> | You: <b>520</b> Other: <b>120</b> |
| You: <b>480</b> Other: <b>480</b> | You: <b>500</b> Other: <b>100</b> | You: <b>580</b> Other: <b>320</b> |
| (4)                               | (5)                               | (6)                               |
| You: <b>500</b> Other: <b>100</b> | You: <b>560</b> Other: <b>300</b> | You: <b>500</b> Other: <b>500</b> |
| You: <b>560</b> Other: <b>300</b> | You: <b>500</b> Other: <b>500</b> | You: <b>500</b> Other: <b>100</b> |
| You: <b>490</b> Other: <b>490</b> | You: <b>490</b> Other: <b>90</b>  | You: <b>570</b> Other: <b>300</b> |
| (7)                               | (8)                               | (9)                               |
| You: <b>510</b> Other: <b>510</b> | You: <b>550</b> Other: <b>300</b> | You: <b>480</b> Other: <b>100</b> |
| You: <b>560</b> Other: <b>300</b> | You: <b>500</b> Other: <b>100</b> | You: <b>490</b> Other: <b>490</b> |
| You: <b>510</b> Other: <b>110</b> | You: <b>500</b> Other: <b>500</b> | You: <b>540</b> Other: <b>300</b> |

## 2 - SoMi (2-9)

The next task involves two people; you and someone else. Imagine that the other person is someone you haven't met before, and will not knowingly meet again in the future (because you will not get to know or see each other in person).

Also imagine that you both get to choose one of the objects we will show you in a minute. There are only a few objects left. Once taken, these will not be replaced. The computer has decided that you always get to choose first.

So to summarize: **You and someone else can each choose one among the objects shown on the screen. It is Important to remember that you always choose first.**

First, here's an example. Click on the object you would take:

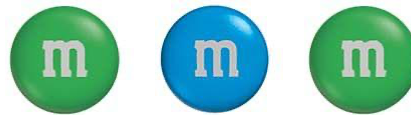

**Remember that there's two of you, and that you always choose first!**

Which of these objects would you take? You pick first, then the other!

*[Instruction repeated for each trial; all trials and product orders offered randomized]*

|   |                                                                                     |    |                                                                                      |
|---|-------------------------------------------------------------------------------------|----|--------------------------------------------------------------------------------------|
| 1 |  | 13 |  |
| 2 |  | 14 |  |
| 3 |  | 15 |  |
| 4 |  | 16 |  |
| 5 |  | 17 |  |

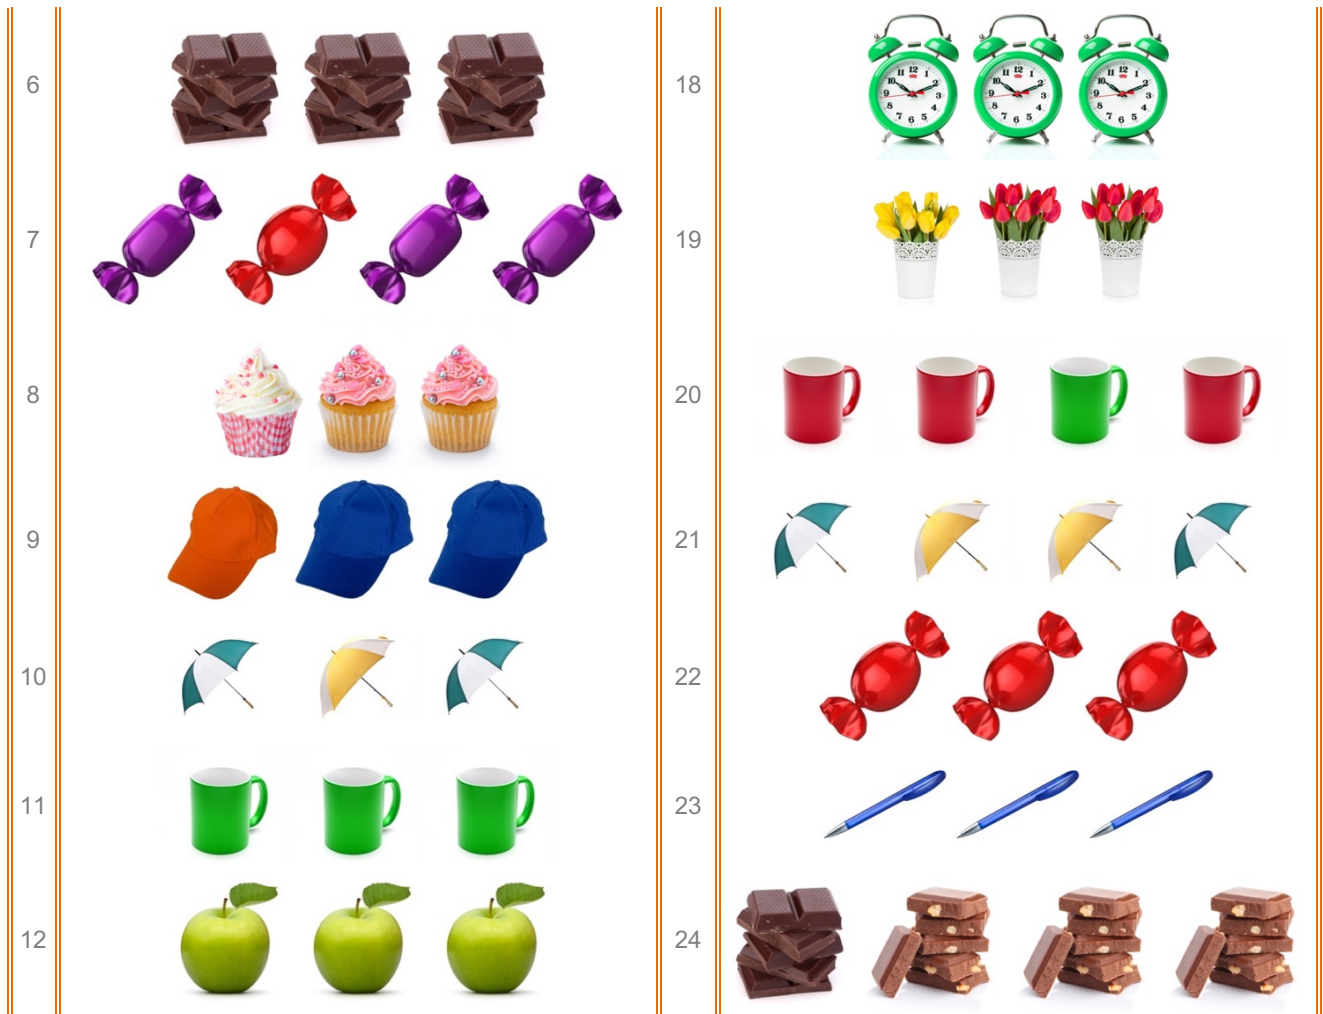

### 3 – SvoSlider (10)

In the next task, imagine that you have been randomly paired with another person, whom we will refer to as **the other**. This other person is someone you do not know and will remain mutually anonymous. All of your choices will be completely confidential.

You will be making a series of decisions about allocating resources between you and this other person. For each of the following questions, please indicate the distribution you prefer most by **selecting the button below the payoff allocations**. You can only make one selection for each question. Your decisions will yield money for both yourself and the other person.

In the example below, a person has chosen to distribute the payoff so that he/she receives 50 dollars, while the anonymous other person receives 40 dollars.

EXAMPLE

|                |                       |                       |                       |                       |                       |                       |                                  |                       |                       |
|----------------|-----------------------|-----------------------|-----------------------|-----------------------|-----------------------|-----------------------|----------------------------------|-----------------------|-----------------------|
| You Receive    | 20                    | 25                    | 30                    | 35                    | 40                    | 45                    | 50                               | 55                    | 60                    |
| Other Receives | 70                    | 65                    | 60                    | 55                    | 50                    | 45                    | 40                               | 35                    | 30                    |
|                | <input type="radio"/> | <input checked="" type="radio"/> | <input type="radio"/> | <input type="radio"/> |

There are no right or wrong answers, this is all about personal preferences. After you have made your decision, select the resulting distribution of money by clicking on the button below your choice. As you can see, your choices will influence both the amount of money you receive as well as the amount of money the other receives.

|   |                                                                                                           |    |                                                                                                         |
|---|-----------------------------------------------------------------------------------------------------------|----|---------------------------------------------------------------------------------------------------------|
| 1 | You receive: 85, 85, 85, 85, 85, 85, 85, 85, 85, 85<br>Other receives: 85, 76, 68, 59, 50, 41, 33, 24, 15 | 7  | You receive: 100, 96, 93, 89, 85, 81, 78, 74, 70<br>Other receives: 50, 56, 63, 69, 75, 81, 88, 94, 100 |
| 2 | You receive: 85, 87, 89, 91, 93, 94, 96, 98, 100<br>Other receives: 15, 19, 24, 28, 33, 37, 41, 46, 50    | 8  | You receive: 90, 91, 93, 94, 95, 96, 98, 99, 100<br>Other receives: 100, 99, 98, 96, 95, 94, 93, 91, 90 |
| 3 | You receive: 50, 54, 59, 63, 68, 72, 76, 81, 85<br>Other receives: 100, 98, 96, 94, 93, 91, 89, 87, 85    | 9  | You receive: 100, 94, 88, 81, 75, 69, 63, 56, 50<br>Other receives: 70, 74, 78, 81, 85, 89, 93, 96, 100 |
| 4 | You receive: 50, 54, 59, 63, 68, 72, 76, 81, 85<br>Other receives: 100, 89, 79, 68, 58, 47, 36, 26, 15    | 10 | You receive: 100, 99, 98, 96, 95, 94, 93, 91, 90<br>Other receives: 70, 74, 78, 81, 85, 89, 93, 96, 100 |
| 5 | You receive: 100, 94, 88, 81, 75, 69, 63, 56, 50<br>Other receives: 50, 56, 63, 69, 75, 81, 88, 94, 100   | 11 | You receive: 70, 74, 78, 81, 85, 89, 93, 96, 100<br>Other receives: 100, 96, 93, 89, 85, 81, 78, 74, 70 |
| 6 | You receive: 100, 98, 96, 94, 93, 91, 89, 87, 85<br>Other receives: 50, 54, 59, 63, 68, 72, 76, 81, 85    | 12 | You receive: 50, 56, 63, 69, 75, 81, 88, 94, 100<br>Other receives: 100, 99, 98, 96, 95, 94, 93, 91, 90 |
|   |                                                                                                           | 13 | You receive: 50, 56, 63, 69, 75, 81, 88, 94, 100<br>Other receives: 100, 94, 88, 81, 75, 69, 63, 56, 50 |
|   |                                                                                                           | 14 | You receive: 100, 96, 93, 89, 85, 81, 78, 74, 70<br>Other receives: 90, 91, 93, 94, 95, 96, 98, 99, 100 |
|   |                                                                                                           | 15 | You receive: 90, 91, 93, 94, 95, 96, 98, 99, 100<br>Other receives: 100, 94, 88, 81, 75, 69, 63, 56, 50 |

### 3 – Trust (11)

The following statements are about your image of “most other people in your environment.” These can be friends, acquaintances, colleagues, or unknown others, as long as you face them every now and then - that they are part of your environment.

We ask you for each of the following statements to indicate the degree to which you agree or disagree with the statement. [7-point scale, *completely disagree-completely agree*]

- I dare to put my fate in the hands of most other people
- I completely trust most other people
- When push comes to shove, I do not trust most other people

The next statements are about the beliefs that others have about you. Again, please think of “most other people in your environment.” These can be friends, acquaintances, colleagues, or unknown others as long as you face them every now and then - that they are part of your environment.

- I think that most other people dare to put their fate in my hands
- I think that most other people completely trust me
- When push comes to shove, most other people do not trust me

#### 4 - Wallet

- Suppose you lost a wallet or a purse with two hundred dollars, and someone found it. Out of a 100 people, how many do you think will return it to you with the money?
- Suppose you lost a wallet or a purse with two hundred dollars, and someone *from your community* found it. Out of a 100 people within your community, how many do you think will return it to you with the money?

#### 5 - Demographics

- Are you a man or a woman?
- How old are you?
- In which country do you reside?
- What is your nationality?
- What is your academic focus or major?
- How many brothers do you have?
- How many sisters do you have?
- Consider that the ladder you see below represents the place that people occupy in society. At the top of this ladder are the people who have more money, more education and better jobs. At the bottom of the ladder are the people who have less money, less education and worse jobs (jobs with less recognition) or are unemployed.

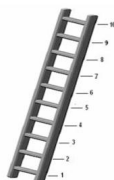

The higher you consider yourself in this ladder, the closer you will be to the people who are at the top of the ladder, and the lower, the closer you will be to people who find themselves at the bottom. Where would you place yourself on this ladder? (12)

- What is the highest level of education your parents have completed? [Less than High School, High School / GED, Some College, 2-year College Degree; 4-year College Degree; Master's Degree; Doctoral Degree; Professional Degree (JD, MD)]
- How would you estimate your parents' income? [5-point scale from *far below average*-*far above average*]
- On a scale from **left** to **right** (50 = center), what is your political orientation?
- And how **progressive** or **conservative** are you (50 = center)?
- Is English your native language? [yes/no]

**Table S1.** Countries and regions, cities, survey language, incentives, data collection method, and total responses.

| Country           | City             | Language        | Incentive | Lab/online | <i>N</i> |
|-------------------|------------------|-----------------|-----------|------------|----------|
| Argentina         | Córdoba          | Spanish         | no        | online     | 145      |
| Australia         | Canberra         | English         | yes (c)   | online     | 118      |
| Austria           | Graz             | German          | yes (c)   | online     | 614      |
| Belgium           | Ghent            | English         | no        | lab        | 94       |
| Canada            | Toronto (UT)     | English         | yes (m)   | online     | 115      |
|                   | Toronto (York)   | English         | yes (c)   | online     | 200      |
| Chile             | Santiago         | Spanish         | yes (l)   | online     | 189      |
| China (Mainland)  | Beijing          | Chinese         | yes (m)   | lab        | 150      |
|                   | Fuzhou           | Chinese         | yes (c)   | lab        | 565      |
|                   | Tianjin          | Chinese         | yes (m)   | lab        | 373      |
| Czech Republic    | Brno             | Czech           | no        | online     | 217      |
| France            | Clermont-Ferrand | French          | yes (c)   | online     | 207      |
| Germany           | Aachen           | English         | yes (l)   | online     | 341      |
|                   | Bonn             | English         | yes (m)   | online     | 177      |
|                   | Jena             | English         | yes (m)   | lab        | 154      |
|                   | Tübingen         | English         | yes (l)   | lab/online | 221      |
| Greece            | Athens           | Greek           | no        | lab        | 105      |
| Hong Kong (China) | Hong Kong (City) | English         | yes (m)   | lab        | 241      |
|                   | Hong Kong (CUH)  | English         | yes (l)   | lab        | 152      |
| India             | Allahabad        | English         | yes (m)   | lab        | 174      |
| Indonesia         | Brawijaya        | English/Bahasa  | yes (l)   | online     | 402      |
| Israel            | Beer Sheva       | Hebrew          | yes (c)   | lab/online | 202      |
|                   | Jerusalem        | Hebrew          | yes (l)   | online     | 182      |
| Japan             | Sapporo/Tokyo    | Japanese        | yes (m)   | online     | 273      |
| Mexico            | Xalapa           | Spanish         | no        | online     | 150      |
| Netherlands       | Amsterdam        | English         | yes (m)   | lab        | 235      |
| Poland            | Warsaw           | English         | no        | online     | 147      |
| Portugal          | Lisbon           | English         | yes (c/l) | lab        | 152      |
| Romania           | Iasi             | English         | yes (l)   | online     | 142      |
| Russia            | Moscow           | English/Russian | no        | online     | 217      |
| Singapore         | Singapore        | English         | yes (m/c) | lab        | 167      |
| South Africa      | Pretoria         | English         | no        | online     | 365      |
| South Korea       | Seoul            | Korean          | yes (c)   | online     | 394      |
| Spain             | Valencia         | Spanish         | no        | online     | 222      |
| Sweden            | Stockholm        | English         | yes (m)   | lab        | 164      |
| Switzerland       | Zurich           | English         | no        | lab/online | 267      |
| Turkey            | Izmir            | Turkish         | yes (c)   | online     | 508      |
| United Kingdom    | London           | English         | yes (c)   | online     | 135      |
|                   | Nottingham       | English         | yes (l)   | online     | 262      |
|                   | Southampton      | English         | yes (c)   | online     | 185      |
| United States     | Columbia, SC     | English         | yes (m)   | lab        | 152      |
|                   | Newark, DE       | English         | yes (c)   | online     | 420      |
|                   | Pullman, WA      | English         | yes (c)   | lab        | 189      |
|                   | Riverside, CA    | English         | yes (l)   | online     | 167      |
|                   | Seattle, WA      | English         | yes (c)   | lab        | 102      |

*Note.* In the incentive column, (c) = course credits, (l) = lottery, and (m) = monetary. Total *N* = 10,353.

**Table S2.** Valid scores, means, and standard deviations of SoMi and SVO per country or region.

|                   | <b>SoMi</b> |           |          | <b>SVO</b> |           |          |
|-------------------|-------------|-----------|----------|------------|-----------|----------|
|                   | <i>M</i>    | <i>SD</i> | <i>N</i> | <i>M</i>   | <i>SD</i> | <i>N</i> |
| Argentina         | 58.8        | 19.7      | 107      | 25.5       | 16.1      | 99       |
| Australia         | 64.2        | 24.1      | 90       | 27.3       | 16.4      | 86       |
| Austria           | 69.8        | 20.5      | 452      | 28.8       | 16.0      | 428      |
| Belgium           | 62.0        | 21.0      | 93       | 23.9       | 15.3      | 93       |
| Canada            | 57.4        | 24.5      | 293      | 18.6       | 16.8      | 292      |
| Chile             | 63.3        | 22.0      | 161      | 27.4       | 14.7      | 159      |
| China (Hong Kong) | 55.3        | 24.5      | 314      | 15.6       | 16.0      | 305      |
| China (mainland)  | 62.4        | 23.8      | 729      | 23.4       | 14.4      | 649      |
| Czech Republic    | 68.8        | 21.8      | 217      | 27.9       | 15.4      | 217      |
| France            | 64.6        | 25.3      | 206      | 23.7       | 15.7      | 206      |
| Germany           | 65.2        | 20.5      | 715      | 21.4       | 14.1      | 699      |
| Greece            | 56.4        | 25.9      | 86       | 22.2       | 17.8      | 86       |
| India             | 50.6        | 22.7      | 169      | 18.8       | 16.3      | 163      |
| Indonesia         | 46.2        | 27.7      | 209      | 19.2       | 17.2      | 181      |
| Israel            | 68.8        | 19.7      | 334      | 23.5       | 13.8      | 322      |
| Japan             | 72.0        | 25.1      | 273      | 21.8       | 15.3      | 273      |
| Mexico            | 68.9        | 22.5      | 150      | 31.6       | 13.7      | 150      |
| Netherlands       | 66.8        | 23.4      | 229      | 23.1       | 13.1      | 228      |
| Poland            | 60.7        | 22.7      | 78       | 19.9       | 15.0      | 71       |
| Portugal          | 63.6        | 19.0      | 151      | 24.8       | 14.0      | 151      |
| Republic of Korea | 56.4        | 25.0      | 313      | 17.5       | 14.4      | 307      |
| Romania           | 60.2        | 23.4      | 75       | 20.3       | 18.8      | 70       |
| Russia            | 65.1        | 21.6      | 126      | 26.0       | 14.5      | 118      |
| Singapore         | 65.8        | 24.5      | 135      | 25.5       | 15.9      | 129      |
| South Africa      | 50.9        | 22.2      | 256      | 21.2       | 17.7      | 208      |
| Spain             | 65.6        | 21.7      | 159      | 27.1       | 14.5      | 143      |
| Sweden            | 63.6        | 24.3      | 164      | 21.8       | 15.1      | 164      |
| Switzerland       | 68.5        | 20.8      | 203      | 23.4       | 15.7      | 196      |
| Turkey            | 47.1        | 26.3      | 366      | 17.7       | 16.9      | 346      |
| United Kingdom    | 64.8        | 21.5      | 475      | 23.6       | 15.5      | 462      |
| United States     | 58.5        | 23.8      | 1,026    | 19.4       | 16.5      | 1,020    |

*Note.* SoMi = social mindfulness; SVO = social value orientation. See Main Text for SoMi-sample. For SVO, we collected 8,021 valid responses, 2916 males and 4913 females, 129 not reported.  $M_{age} = 21.98$ ,  $SD = 5.19$ . Valid responses may differ between measures and total amount of responses reported in Table S1.



## SVO

**Table S3.** Bivariate relations of social value orientation (SVO) within the domains of trust and demographic variables, at individual and country level.

|                     | Individual level |          |           |          | Country level |          |           |          |
|---------------------|------------------|----------|-----------|----------|---------------|----------|-----------|----------|
|                     | $\beta$          | <i>t</i> | <i>df</i> | <i>p</i> | $\beta$       | <i>t</i> | <i>df</i> | <i>p</i> |
| <b>Trust</b>        |                  |          |           |          |               |          |           |          |
| Trust               | 0.05             | 4.15     | 7748      | < .001   | -0.22         | -1.17    | 27.98     | .250     |
| Perceived Trust     | 0.01             | 1.12     | 7721      | .260     | -0.14         | -0.74    | 27.99     | .467     |
| <b>Demographics</b> |                  |          |           |          |               |          |           |          |
| Education           | 0.05             | 4.37     | 7645      | < .001   | 0.50          | 3.08     | 27.91     | .005     |
| Parental education  | 0.01             | 0.93     | 7604      | .350     | 0.27          | 1.50     | 28.03     | .146     |
| Age                 | 0.01             | 0.55     | 7675      | .580     | 0.27          | 1.47     | 27.96     | .153     |
| Gender              | 0.00             | -0.16    | 7676      | .870     | 0.31          | 1.73     | 28.03     | .095     |
| Income              | -0.01            | -0.51    | 7594      | .610     | 0.01          | 0.05     | 28.03     | .959     |
| SES                 | -0.09            | -7.86    | 7612      | < .001   | -0.32         | -1.78    | 27.97     | .086     |
| Brothers (number)   | 0.02             | 1.56     | 7647      | .120     | 0.11          | 0.60     | 27.98     | .556     |
| Sisters (number)    | 0.00             | -0.40    | 7646      | .690     | 0.02          | 0.08     | 28.04     | .938     |

*Note.* Gender: Male = 1, female = 2. SES = socioeconomic status.  $\beta$  may be interpreted as correlation coefficient.

**Table S4.** Social value orientation (SVO): Country level bivariate relations across three domains.

|                             | $\beta$ | <i>t</i> -test | <i>df</i> | <i>p</i> |
|-----------------------------|---------|----------------|-----------|----------|
| <b>Key Variables</b>        |         |                |           |          |
| Trust (WVS)                 | -0.11   | -0.52          | 25.04     | .607     |
| Religiosity                 | -0.18   | -0.92          | 25.07     | .367     |
| Civic Cooperation           | -0.06   | -0.30          | 25.02     | .767     |
| Rule of Law (2015)          | -0.05   | -0.26          | 26.00     | .794     |
| Democracy Index (2014)      | 0.02    | 0.10           | 27.97     | .925     |
| Competitiveness             | -0.18   | -0.97          | 28.05     | .341     |
| Freedom Index               | -0.08   | -0.41          | 27.93     | .687     |
| EPI                         | 0.27    | 1.55           | 26.98     | .134     |
| <b>Hofstede Dimensions</b>  |         |                |           |          |
| Power Distance              | -0.16   | -0.82          | 27.01     | .421     |
| Individualism               | 0.06    | 0.33           | 27.00     | .748     |
| Masculinity                 | 0.10    | 0.53           | 26.98     | .601     |
| Uncertainty Avoidance       | 0.18    | 0.95           | 27.05     | .349     |
| Long Term Orientation       | -0.22   | -1.20          | 28.03     | .239     |
| Indulgence versus Restraint | 0.48    | 2.79           | 27.11     | .010     |
| <b>Economic Indices</b>     |         |                |           |          |
| GDP P/C (2015)              | -0.02   | -0.11          | 28.02     | .910     |
| GNI P/C (2015)              | -0.06   | -0.29          | 27.02     | .771     |
| Gini Index                  | -0.08   | -0.42          | 27.99     | .679     |

*Note.* EPI = Environmental Performance Index (13).

### Robustness check (SoMi)

Given that social mindfulness (SoMi) is computed as a proportion, logically the distribution cannot be normal. However, empirically the score did not critically differ from a Gaussian variate and did not show problematic skew or kurtosis. To check robustness, we repeated all reported analyses using generalized mixed models with beta distribution and log link function and found that all models converged. Results were very similar with only minor differences in the interpretation: The association with trust at the individual level was no longer significant,  $p = .059$ , whereas the association with the GINI index at country level became significant,  $p = .036$ . All directions and effect sizes were consistent across estimation methods. For details, See Tables S5 and S6.

**Table S5.** Bivariate relations of social mindfulness within the domains of trust and social value orientation and demographic variables, at individual and country level using generalized mixed models with beta distribution and log link function.

|                      | Individual level |         |          |          | Country level |          |          |
|----------------------|------------------|---------|----------|----------|---------------|----------|----------|
|                      | <i>Var(I)</i>    | $\beta$ | <i>z</i> | <i>p</i> | $\beta$       | <i>z</i> | <i>p</i> |
| <b>Trust and SVO</b> |                  |         |          |          |               |          |          |
| SVO                  | 0.04             | 0.27    | 24.24    | < .001   | 0.20          | 5.37     | < .001   |
| Trust                | 0.08             | 0.02    | 1.89     | .059     | 0.01          | 0.19     | .851     |
| Perceived Trust      | 0.08             | 0.00    | 0.34     | .737     | -0.02         | -0.28    | .779     |
| <b>Demographics</b>  |                  |         |          |          |               |          |          |
| Education            | 0.08             | 0.02    | 1.71     | .087     | 0.07          | 1.29     | .196     |
| Parental education   | 0.06             | 0.00    | 0.18     | .855     | 0.15          | 3.19     | .001     |
| Age                  | 0.07             | 0.02    | 1.72     | .086     | 0.09          | 1.74     | .082     |
| Gender               | 0.08             | -0.03   | -2.50    | .013     | 0.04          | 0.83     | .407     |
| Income               | 0.07             | -0.01   | -0.75    | .451     | 0.07          | 1.40     | .162     |
| SES                  | 0.07             | -0.03   | -2.72    | .007     | -0.10         | -2.00    | .045     |
| Brothers (number)    | 0.08             | 0.01    | 0.98     | .328     | -0.05         | -0.93    | .351     |
| Sisters (number)     | 0.07             | 0.02    | 1.92     | .055     | -0.10         | -2.07    | .039     |

Note. SVO = social value orientation. Gender: Male = 1, female = 2. SES = socioeconomic status. *Var(I)* represents the variance of the intercepts.

**Table S6.** Country level bivariate relations across three domains using generalized mixed models with beta distribution and log link function.

| <b>Key Variables</b>       | <i>Var(I)</i> | $\beta$ | <i>z</i> | <i>p</i> |
|----------------------------|---------------|---------|----------|----------|
| Trust (WVS)                | 0.06          | 0.08    | 1.45     | .147     |
| Religiosity                | 0.06          | -0.12   | -2.44    | .015     |
| Civic Cooperation          | 0.06          | 0.09    | 1.68     | .092     |
| Rule of Law (2015)         | 0.06          | 0.13    | 2.53     | .012     |
| Democracy Index (2014)     | 0.07          | 0.07    | 1.25     | .210     |
| Competitiveness            | 0.07          | 0.11    | 2.14     | .033     |
| Freedom Index              | 0.07          | -0.09   | -1.81    | .070     |
| EPI (13)                   | 0.05          | 0.17    | 3.67     | < .001   |
| <b>Hofstede Dimensions</b> |               |         |          |          |
| Power Distance             | 0.06          | -0.11   | -2.27    | .023     |
| Individualism              | 0.07          | 0.09    | 1.69     | .092     |
| Masculinity                | 0.07          | 0.06    | 1.21     | .228     |
| Uncertainty Avoidance      | 0.07          | 0.04    | 0.71     | .481     |

|                             |               |         |          |          |
|-----------------------------|---------------|---------|----------|----------|
| Long Term Orientation       | 0.08          | 0.05    | 0.89     | .376     |
| Indulgence versus Restraint | 0.07          | 0.08    | 1.50     | .134     |
| <b>Economic Indices</b>     | <i>Var(I)</i> | $\beta$ | <i>z</i> | <i>p</i> |
| GDP P/C (2015)              | 0.06          | 0.13    | 2.67     | .007     |
| GNI P/C (2015)              | 0.06          | 0.13    | 2.61     | .009     |
| Gini Index                  | 0.07          | -0.10   | -2.09    | .036     |

Note. EPI = Environmental Performance Index (13). GDP P/C = Gross Domestic Product per capita. GNI P/C = Gross National Income per capita. Gini Index = Income inequality. Var(I) represents the variance of the intercepts.

## SI References

1. P. A. M. Van Lange, E. M. N. De Bruin, W. Otten, J. A. Joireman, Development of prosocial, individualistic, and competitive orientations: Theory and preliminary evidence. *J. Pers. Soc. Psychol.* **73**, 733–746 (1997).
2. N. J. Van Doesum, D. A. W. Van Lange, P. A. M. Van Lange, Social mindfulness: Skill and will to navigate the social world. *J. Pers. Soc. Psychol.* **105**, 86–103 (2013).
3. P. A. M. Van Lange, N. J. Van Doesum, Social mindfulness and social hostility. *Curr. Opin. Behav. Sci.* **3**, 18–24 (2015).
4. N. J. Van Doesum, *et al.*, Social mindfulness: Prosocial the active way. *J. Posit. Psychol.* **15**, 183–193 (2020).
5. N. J. Van Doesum, J. W. Van Prooijen, L. Verburgh, P. A. M. Van Lange, Social hostility in soccer and beyond. *PLoS One* **11**, 1–13 (2016).
6. N. J. Van Doesum, J. M. Tybur, P. A. M. Van Lange, Class impressions: Higher social class elicits lower prosociality. *J. Exp. Soc. Psychol.* **68**, 11–20 (2017).
7. I. L. J. Lemmers-Jansen, *et al.*, Giving others the option of choice: An fMRI study on low-cost cooperation. *Neuropsychologia* **109**, 1–9 (2018).
8. I. L. J. Lemmers-Jansen, *et al.*, Social mindfulness and psychosis: Neural response to socially mindful behavior in first-episode psychosis and patients at clinical high-risk. *Front. Hum. Neurosci.* **13**, 1–13 (2019).
9. D. Mischkowski, I. Thielmann, A. Glöckner, Think it through before making a choice? Processing mode does not influence social mindfulness. *J. Exp. Soc. Psychol.* **74**, 85–97 (2018).
10. R. O. Murphy, K. A. Ackermann, M. J. J. Handgraaf, Measuring Social Value Orientation. *Judgm. Decis. Mak.* **6**, 771–781 (2011).
11. P. A. M. Van Lange, A. A. E. Vinkhuyzen, D. Posthuma, Genetic influences are virtually absent for trust. *PLoS One* **9** (2014).
12. N. E. Adler, E. S. Epel, G. Castellazzo, J. R. Ickovics, Relationship of subjective and objective social status with psychological and physiological functioning: Preliminary data in healthy white women. *Heal. Psychol.* **19**, 586–592 (2000).
13. D. C. Esty, M. A. Levy, C. H. Kim, A. de Sherbinin, T. Srebotnjak, V. Mara. 2008 *Environmental Performance Index* (New Haven: Yale Center for Environmental Law and Policy, 2008).
